# Supplementary material for: Increased Visceral Adipose Tissue as a Potential Risk Factor in Patients with Embolic Stroke of Undetermined Source (ESUS)
Source: PubMed Central journal article supplement (PMC4354901; doi:10.1371/journal.pone.0120598), 2015-03-10
Supplement: pone.0120598.s001.pdf [file pone.0120598.s001.pdf]

**Table S1.** Statistical comparison of the reference populations.

|                           | The North American reference population <sup>26</sup> |                                 | The local reference population 1 <sup>27, 28</sup>   |                                 | The local reference population 2                     |                      |
|---------------------------|-------------------------------------------------------|---------------------------------|------------------------------------------------------|---------------------------------|------------------------------------------------------|----------------------|
| Subjects, n               | 1160                                                  |                                 | 129                                                  |                                 | 18                                                   |                      |
| Sex                       | 55.2% men                                             |                                 | 45.7% men                                            |                                 | 100% men                                             |                      |
| Ethnicity                 | 88% non-Hispanic white                                |                                 | 100% non-Hispanic white                              |                                 | 100% non-Hispanic white                              |                      |
|                           | Men (n=640)<br>A                                      | Women (n=520)<br>B              | Men (n=59)<br>C                                      | Women (n=70)<br>D               | Men (n=18)<br>E                                      | Women (n=0)<br>(n=0) |
| Age, years                | 56.0±11.4<br><i>A vs. C **</i><br><i>A vs. E ns</i>   | 57.0±11.2<br><i>B vs. D **</i>  | 34.9±6.2<br><i>C vs. A **</i><br><i>C vs. E **</i>   | 36.4±6.4<br><i>D vs. B **</i>   | 53.4±3.2<br><i>E vs. A ns</i><br><i>E vs. C **</i>   | <i>NA</i>            |
| VAT area, cm <sup>2</sup> | 99.6±44.4<br><i>A vs. C **</i><br><i>A vs. E ns</i>   | 54.2±34.3<br><i>B vs. D **</i>  | 125.1±67.8<br><i>C vs. A **</i><br><i>C vs. E ns</i> | 85.0±11.9<br><i>D vs. B **</i>  | 118.3±75.9<br><i>E vs. A ns</i><br><i>E vs. C ns</i> | <i>NA</i>            |
| BMI, kg/m <sup>2</sup>    | 27.8±3.9<br><i>A vs. C **</i><br><i>A vs. E *</i>     | 25.6±4.8<br><i>B vs. D ns</i>   | 26.0±3.5<br><i>C vs. A **</i><br><i>C vs. E ns</i>   | 26.3±5.4<br><i>D vs. B ns</i>   | 25.0±3.1<br><i>E vs. A *</i><br><i>E vs. C ns</i>    | <i>NA</i>            |
| Total cholesterol, mg/dl  | 197.9±37.3<br><i>A vs. C ns</i><br><i>A vs. E ns</i>  | 204.3±37.1<br><i>B vs. D **</i> | 195.3±34.4<br><i>C vs. A ns</i><br><i>C vs. E *</i>  | 184.8±33.3<br><i>D vs. B **</i> | 215.1±41.8<br><i>E vs. A ns</i><br><i>E vs. C *</i>  | <i>NA</i>            |
| HDL-cholesterol, mg/dl    | 44.3±12.8<br><i>A vs. C ns</i><br><i>A vs. E **</i>   | 62.3±16.0<br><i>B vs. D **</i>  | 44.1±8.5<br><i>C vs. A ns</i><br><i>C vs. E **</i>   | 53.0±10.8<br><i>D vs. B **</i>  | 59.9±17.6<br><i>E vs. A **</i><br><i>E vs. C **</i>  | <i>NA</i>            |
| LDL-cholesterol, mg/dl    | <i>NA</i>                                             | <i>NA</i>                       | <i>NA</i>                                            | <i>NA</i>                       | 136.5±35.5                                           | <i>NA</i>            |
| Triglycerides, mg/dl      | <i>NA</i>                                             | <i>NA</i>                       | 119.6±62.0<br><i>C vs. E ns</i>                      | 86.8±43.4                       | 92.2±45.8<br><i>E vs. C ns</i>                       | <i>NA</i>            |

VAT, visceral adipose tissue; BMI, body mass index; HDL, high density lipoprotein; LDL, low density lipoprotein

\* Statistically significant difference at level  $p < 0.05$ , \*\* statistically significant difference at level  $p < 0.01$
